# Supplementary material for: Towards a Better Quantification of Cyanotoxins in Fruits and Vegetables: Validation and Application of an UHPLC-MS/MS-Based Method on Belgian Products
Source: MDPI journal article supplement (doi:10.3390/separations9100319), 2022-10-20
Supplement: s1 [file s1]

# Supplementary data: Towards a better quantification of cyanotoxins in fruits and vegetables: validation and application of a UHPLC-MS/MS-based method on Belgian products

*Table s1: Validation results for eight microcystin congeners (MCs) and nodularin (NOD) in carrots, lettuce and strawberries at three concentration levels and on average. Included parameters are recovery, repeatability, reproducibility, measurement uncertainty (MU), average signal to noise for LOD, average signal to noise for LOQ, R<sup>2</sup>.*

| Validation data Carrots |                      |              |                   |                     |                             |                                 |                                 |                |
|-------------------------|----------------------|--------------|-------------------|---------------------|-----------------------------|---------------------------------|---------------------------------|----------------|
| Toxins                  | Spiked Concentration | Recovery (%) | Repeatability (%) | Reproducibility (%) | Measurement Uncertainty (%) | Average Signal to noise for LOD | Average Signal to noise for LOQ | R <sup>2</sup> |
| MC-RR                   | 1 µg/kg              | 82.00%       | 4.42%             | 13.20%              | 26.39%                      | 133.07                          | 174.79                          | 0.99           |
|                         | 5 µg/kg              | 80.00%       | 5.30%             | 5.30%               | 10.61%                      |                                 |                                 |                |
|                         | 25 µg/kg             | 84.00%       | 8.30%             | 10.97%              | 21.94%                      |                                 |                                 |                |
|                         | Average              | 82.00%       | 6.01%             | 9.82%               | 19.65%                      |                                 |                                 |                |
| NOD                     | 1 µg/kg              | 84.00%       | 3.69%             | 11.41%              | 22.82%                      | 154.23                          | 172.07                          | 0.99           |
|                         | 5 µg/kg              | 81.00%       | 5.71%             | 7.38%               | 14.76%                      |                                 |                                 |                |
|                         | 25 µg/kg             | 82.00%       | 5.88%             | 7.02%               | 14.04%                      |                                 |                                 |                |
|                         | Average              | 82.33%       | 5.10%             | 8.60%               | 17.21%                      |                                 |                                 |                |
| MC-LA                   | 1 µg/kg              | 85.00%       | 8.92%             | 13.50%              | 27.00%                      | 50.08                           | 76.93                           | 0.99           |
|                         | 5 µg/kg              | 79.00%       | 7.16%             | 9.21%               | 18.42%                      |                                 |                                 |                |
|                         | 25 µg/kg             | 81.00%       | 8.11%             | 8.11%               | 16.23%                      |                                 |                                 |                |

|       |          |        |        |        |        |       |       |      |
|-------|----------|--------|--------|--------|--------|-------|-------|------|
|       | Average  | 81.67% | 8.06%  | 10.27% | 20.55% |       |       |      |
| MC-LF | 1 µg/kg  | 83.00% | 3.51%  | 11.30% | 22.59% | 75.82 | 78.92 | 0.99 |
|       | 5 µg/kg  | 74.00% | 5.45%  | 14.37% | 28.74% |       |       |      |
|       | 25 µg/kg | 78.00% | 11.83% | 11.83% | 23.66% |       |       |      |
|       | Average  | 78.33% | 6.93%  | 12.50% | 25.00% |       |       |      |
| MC-LR | 1 µg/kg  | 86.00% | 4.89%  | 12.26% | 24.53% | 63.12 | 68.34 | 0.99 |
|       | 5 µg/kg  | 79.00% | 5.48%  | 9.17%  | 18.35% |       |       |      |
|       | 25 µg/kg | 81.00% | 7.60%  | 7.60%  | 15.24% |       |       |      |
|       | Average  | 82.00% | 5.99%  | 9.68%  | 19.37% |       |       |      |
| MC-LY | 1 µg/kg  | 79.00% | 10.87% | 10.87% | 21.74% | 25.58 | 37.39 | 0.99 |
|       | 5 µg/kg  | 77.00% | 3.92%  | 7.20%  | 14.40% |       |       |      |
|       | 25 µg/kg | 81.00% | 8.49%  | 8.49%  | 16.98% |       |       |      |
|       | Average  | 79.00% | 7.76%  | 8.85%  | 17.71% |       |       |      |
| MC-LW | 1 µg/kg  | 76.00% | 5.24%  | 6.50%  | 12.99% | 62.44 | 68.68 | 0.99 |
|       | 5 µg/kg  | 71.00% | 5.96%  | 14.15% | 28.31% |       |       |      |
|       | 25 µg/kg | 77.00% | 12.77% | 12.77% | 25.55% |       |       |      |
|       | Average  | 74.67% | 7.99%  | 11.14% | 22.28% |       |       |      |
| MC-YR | 1 µg/kg  | 87.00% | 8.27%  | 12.87% | 25.73% | 26.99 | 40.33 | 0.99 |
|       | 5 µg/kg  | 79.00% | 6.11%  | 10.59% | 21.17% |       |       |      |
|       | 25 µg/kg | 80.00% | 6.18%  | 6.18%  | 12.37% |       |       |      |
|       | Average  | 82.00% | 6.86%  | 9.88%  | 19.76% |       |       |      |
|       | 1 µg/kg  | 79.00% | 7.86%  | 9.59%  | 19.18% | 29.18 | 33.62 | 0.99 |

|                         |                      |              |                   |                     |                                |                                    |                                    |                |
|-------------------------|----------------------|--------------|-------------------|---------------------|--------------------------------|------------------------------------|------------------------------------|----------------|
| MC-WR                   | 5 µg/kg              | 75.00%       | 8.87%             | 17.35%              | 34.71%                         |                                    |                                    |                |
|                         | 25 µg/kg             | 77.00%       | 8.98%             | 8.98%               | 17.96%                         |                                    |                                    |                |
|                         | Average              | 77.00%       | 8.57%             | 11.97%              | 23.95%                         |                                    |                                    |                |
| SUM                     | 9 µg/kg              | 82.00%       | 3.72%             | 7.97%               | 15.93%                         | N.A.                               | N.A.                               | N.A.           |
|                         | 45 µg/kg             | 77.00%       | 5.69%             | 9.40%               | 18.79%                         |                                    |                                    |                |
|                         | 225 µg/kg            | 80.00%       | 8.46%             | 8.46%               | 16.93%                         |                                    |                                    |                |
|                         | Average              | 79.67%       | 5.96%             | 8.61%               | 17.22%                         |                                    |                                    |                |
| Validation data lettuce |                      |              |                   |                     |                                |                                    |                                    |                |
| Toxins                  | Spiked Concentration | Recovery (%) | Repeatability (%) | Reproducibility (%) | Measurement<br>Uncertainty (%) | Average Signal to noise<br>for LOD | Average Signal to<br>noise for LOQ | R <sup>2</sup> |
| MC-RR                   | 1 µg/kg              | 85.00%       | 7.76%             | 7.76%               | 15.51%                         | 126.37                             | 139.99                             | 0.99           |
|                         | 5 µg/kg              | 87.00%       | 4.52%             | 9.59%               | 19.17%                         |                                    |                                    |                |
|                         | 25 µg/kg             | 84.00%       | 6.49%             | 13.73%              | 27.46%                         |                                    |                                    |                |
|                         | Average              | 85.33%       | 6.25%             | 10.36%              | 20.71%                         |                                    |                                    |                |
| NOD                     | 1 µg/kg              | 84.00%       | 7.64%             | 11.54%              | 23.08%                         | 105.79                             | 129.43                             | 0.99           |
|                         | 5 µg/kg              | 93.00%       | 5.41%             | 6.92%               | 13.84%                         |                                    |                                    |                |
|                         | 25 µg/kg             | 87.00%       | 6.29%             | 11.20%              | 22.41%                         |                                    |                                    |                |
|                         | Average              | 88.00%       | 6.45%             | 9.89%               | 19.77%                         |                                    |                                    |                |
| MC-LA                   | 1 µg/kg              | 86.00%       | 7.52%             | 13.12%              | 26.23%                         | 37.36                              | 50.85                              | 0.99           |
|                         | 5 µg/kg              | 90.00%       | 5.76%             | 7.64%               | 15.28%                         |                                    |                                    |                |
|                         | 25 µg/kg             | 85.00%       | 5.71%             | 10.68%              | 21.35%                         |                                    |                                    |                |

|       |          |        |        |        |        |       |       |      |
|-------|----------|--------|--------|--------|--------|-------|-------|------|
|       | Average  | 87.00% | 6.33%  | 10.48% | 20.96% |       |       |      |
| MC-LF | 1 µg/kg  | 81.00% | 7.67%  | 8.75%  | 17.49% | 55.52 | 68.48 | 0.99 |
|       | 5 µg/kg  | 89.00% | 6.01%  | 6.01%  | 12.02% |       |       |      |
|       | 25 µg/kg | 83.00% | 7.40%  | 8.67%  | 17.35% |       |       |      |
|       | Average  | 84.33% | 7.03%  | 7.81%  | 15.62% |       |       |      |
| MC-LR | 1 µg/kg  | 85.00% | 5.48%  | 8.69%  | 17.39% | 53.46 | 72.95 | 0.99 |
|       | 5 µg/kg  | 86.00% | 5.93%  | 8.38%  | 16.75% |       |       |      |
|       | 25 µg/kg | 81.00% | 6.54%  | 15.24% | 30.48% |       |       |      |
|       | Average  | 84.00% | 5.99%  | 10.77% | 21.54% |       |       |      |
| MC-LY | 1 µg/kg  | 87.00% | 6.48%  | 11.64% | 23.29% | 27.24 | 35.25 | 0.99 |
|       | 5 µg/kg  | 91.00% | 7.38%  | 7.40%  | 14.80% |       |       |      |
|       | 25 µg/kg | 85.00% | 6.12%  | 10.11% | 20.22% |       |       |      |
|       | Average  | 87.67% | 6.66%  | 9.72%  | 19.43% |       |       |      |
| MC-LW | 1 µg/kg  | 79.00% | 6.36%  | 7.25%  | 14.50% | 41.82 | 58.34 | 0.99 |
|       | 5 µg/kg  | 85.00% | 6.60%  | 6.57%  | 13.31% |       |       |      |
|       | 25 µg/kg | 81.00% | 8.74%  | 8.74%  | 17.47% |       |       |      |
|       | Average  | 81.67% | 7.23%  | 7.52%  | 15.10% |       |       |      |
| MC-YR | 1 µg/kg  | 83.00% | 13.03% | 14.25% | 28.51% | 26.14 | 32.56 | 0.99 |
|       | 5 µg/kg  | 90.00% | 4.45%  | 6.36%  | 12.72% |       |       |      |
|       | 25 µg/kg | 85.00% | 7.00%  | 11.87% | 23.75% |       |       |      |
|       | Average  | 86.00% | 8.16%  | 10.83% | 21.66% |       |       |      |
|       | 1 µg/kg  | 80.00% | 7.28%  | 20.35% | 40.70% | 25.79 | 25.90 | 0.99 |

|                            |                      |              |                   |                     |                                |                                    |                                    |                |
|----------------------------|----------------------|--------------|-------------------|---------------------|--------------------------------|------------------------------------|------------------------------------|----------------|
| MC-WR                      | 5 µg/kg              | 84.00%       | 6.53%             | 12.51%              | 25.03%                         |                                    |                                    |                |
|                            | 25 µg/kg             | 79.00%       | 8.81%             | 17.60%              | 35.20%                         |                                    |                                    |                |
|                            | Average              | 81.00%       | 7.54%             | 16.82%              | 33.64%                         |                                    |                                    |                |
| SUM                        | 9 µg/kg              | 83.00%       | 4.75%             | 9.26%               | 18.51%                         | N.A.                               | N.A.                               | N.A.           |
|                            | 45 µg/kg             | 88.00%       | 5.53%             | 6.96%               | 13.92%                         |                                    |                                    |                |
|                            | 225 µg/kg            | 83.00%       | 6.85%             | 11.41%              | 22.82%                         |                                    |                                    |                |
|                            | Average              | 84.67%       | 5.71%             | 9.21%               | 18.42%                         |                                    |                                    |                |
| Validation data Strawberry |                      |              |                   |                     |                                |                                    |                                    |                |
| Toxins                     | Spiked Concentration | Recovery (%) | Repeatability (%) | Reproducibility (%) | Measurement<br>Uncertainty (%) | Average Signal to noise<br>for LOD | Average Signal to<br>noise for LOQ | R <sup>2</sup> |
| MC-RR                      | 5 µg/kg              | 77.00%       | 2.32%             | 5.80%               | 11.60%                         | 710.17                             | 927.28                             | 0.99           |
|                            | 10 µg/kg             | 82.00%       | 5.53%             | 12.73%              | 25.46%                         |                                    |                                    |                |
|                            | 25 µg/kg             | 76.00%       | 7.29%             | 7.29%               | 14.58%                         |                                    |                                    |                |
|                            | Average              | 76.00%       | 4.61%             | 5.91%               | 11.82%                         |                                    |                                    |                |
| NOD                        | 1 µg/kg              | 77.00%       | 6.39%             | 8.03%               | 16.07%                         | 212.13                             | 259.61                             | 0.99           |
|                            | 5 µg/kg              | 78.00%       | 4.52%             | 6.52%               | 13.03%                         |                                    |                                    |                |
|                            | 25 µg/kg             | 77.00%       | 3.65%             | 6.33%               | 12.65%                         |                                    |                                    |                |
|                            | Average              | 77.33%       | 4.85%             | 6.96%               | 13.92%                         |                                    |                                    |                |
| MC-LA                      | 1 µg/kg              | 82.00%       | 9.91%             | 11.19%              | 22.37%                         | 66.56                              | 86.60                              | 0.99           |
|                            | 5 µg/kg              | 78.00%       | 4.06%             | 6.58%               | 13.16%                         |                                    |                                    |                |
|                            | 25 µg/kg             | 77.00%       | 3.87%             | 5.37%               | 10.74%                         |                                    |                                    |                |

|       |          |        |        |        |        |       |       |      |
|-------|----------|--------|--------|--------|--------|-------|-------|------|
|       | Average  | 79.00% | 5.95%  | 7.71%  | 15.42% |       |       |      |
| MC-LF | 1 µg/kg  | 74.00% | 7.61%  | 7.61%  | 15.23% | 88.72 | 89.63 | 0.99 |
|       | 5 µg/kg  | 76.00% | 3.02%  | 5.82%  | 11.64% |       |       |      |
|       | 25 µg/kg | 76.00% | 4.04%  | 5.06%  | 10.12% |       |       |      |
|       | Average  | 75.33% | 4.89%  | 6.16%  | 12.33% |       |       |      |
| MC-LR | 1 µg/kg  | 79.00% | 7.06%  | 7.16%  | 14.32% | 66.36 | 89.14 | 0.99 |
|       | 5 µg/kg  | 77.00% | 5.13%  | 6.05%  | 12.11% |       |       |      |
|       | 25 µg/kg | 75.00% | 4.84%  | 6.73%  | 13.46% |       |       |      |
|       | Average  | 77.00% | 5.68%  | 6.65%  | 13.29% |       |       |      |
| MC-LY | 1 µg/kg  | 77.00% | 6.50%  | 8.38%  | 16.76% | 35.86 | 53.57 | 0.99 |
|       | 5 µg/kg  | 74.00% | 3.64%  | 8.15%  | 16.30% |       |       |      |
|       | 25 µg/kg | 74.00% | 4.78%  | 6.89%  | 13.79% |       |       |      |
|       | Average  | 75.00% | 4.97%  | 7.81%  | 15.62% |       |       |      |
| MC-LW | 1 µg/kg  | 75.00% | 7.95%  | 13.47% | 26.94% | 76.89 | 81.55 | 0.99 |
|       | 5 µg/kg  | 73.00% | 3.79%  | 8.66%  | 17.32% |       |       |      |
|       | 25 µg/kg | 73.00% | 5.75%  | 8.14%  | 16.29% |       |       |      |
|       | Average  | 73.67% | 5.83%  | 10.09% | 20.18% |       |       |      |
| MC-YR | 1 µg/kg  | 73.00% | 8.09%  | 12.77% | 25.54% | 33.53 | 40.28 | 0.99 |
|       | 5 µg/kg  | 74.00% | 4.10%  | 7.88%  | 15.75% |       |       |      |
|       | 25 µg/kg | 74.00% | 4.27%  | 6.81%  | 13.61% |       |       |      |
|       | Average  | 73.67% | 5.49%  | 9.15%  | 18.30% |       |       |      |
|       | 1 µg/kg  | 77.00% | 11.54% | 11.54% | 23.07% | 33.72 | 32.12 | 0.99 |

|       |           |        |       |        |        |      |      |      |
|-------|-----------|--------|-------|--------|--------|------|------|------|
| MC-WR | 5 µg/kg   | 73.00% | 6.01% | 9.19%  | 18.38% |      |      |      |
|       | 25 µg/kg  | 73.00% | 5.28% | 9.27%  | 18.54% |      |      |      |
|       | Average   | 74.33% | 7.61% | 10.00% | 20.00% |      |      |      |
| SUM   | 8 µg/kg   | 77.00% | 6.89% | 6.89%  | 13.78% | N.A. | N.A. | N.A. |
|       | 45 µg/kg  | 76.00% | 3.35% | 5.95%  | 11.90% |      |      |      |
|       | 225 µg/kg | 75.00% | 3.86% | 5.31%  | 10.63% |      |      |      |
|       | Average   | 76.00% | 4.54% | 5.90%  | 11.79% |      |      |      |

Table s2: Overview of samples taken from the Belgium market showing separate results, origin, sample type and sample annotation.

| Sample annotation | Sample type  | origin                        | Sample date | Total concentration MCs (µg kg <sup>-1</sup> ) |
|-------------------|--------------|-------------------------------|-------------|------------------------------------------------|
| S22FD00063        | Strawberries | Hoogstraten, Belgium          | 29/06/2021  | <LOD                                           |
| S22FD00109        | Strawberries | Hoogstraten, Belgium          | 30/06/2021  | <LOD                                           |
| S22FD00110        | Strawberries | Belgium                       | 30/06/2021  | <LOD                                           |
| S22FD00111        | Strawberries | Belgium                       | 30/06/2021  | <LOD                                           |
| S22FD00112        | Strawberries | Hoogstraten, Belgium          | 30/06/2021  | <LOD                                           |
| S22FD00113        | Strawberries | Hoogstraten, Belgium          | 30/06/2021  | <LOD                                           |
| S22FD00114        | Strawberries | Sint-Katelijne Waver, Belgium | 30/06/2021  | <LOD                                           |
| S22FD00115        | Radish       | Nederland                     | 27/07/2021  | <LOD                                           |
| S22FD00116        | Radish       | Belgium                       | 27/07/2021  | <LOD                                           |
| S22FD00117        | Radish       | Belgium                       | 27/07/2021  | <LOD                                           |

|            |         |                               |            |      |
|------------|---------|-------------------------------|------------|------|
| S22FD00118 | Radish  | Belgium                       | 27/07/2021 | <LOD |
| S22FD00119 | Radish  | Nederland                     | 27/07/2021 | <LOD |
| S22FD00120 | Lettuce | Belgium                       | 10/08/2021 | <LOD |
| S22FD00121 | Lettuce | Belgium                       | 10/08/2021 | <LOD |
| S22FD00122 | Lettuce | Belgium                       | 10/08/2021 | <LOD |
| S22FD00123 | Lettuce | Sint-Katelijne Waver, Belgium | 10/08/2021 | <LOD |
| S22FD00124 | Lettuce | Sint-Katelijne Waver, Belgium | 10/08/2021 | <LOD |
| S22FD00125 | Lettuce | Belgium                       | 15/08/2021 | <LOD |
| S22FD00126 | Lettuce | Belgium                       | 16/08/2021 | <LOD |
| S22FD00127 | Lettuce | Belgium                       | 17/08/2021 | <LOD |
| S22FD00128 | Lettuce | Belgium                       | 18/08/2021 | <LOD |
| S22FD00129 | Lettuce | Belgium                       | 17/11/2021 | <LOD |
| S22FD00130 | Lettuce | Belgium                       | 17/11/2021 | <LOD |
| S22FD00131 | Lettuce | Belgium                       | 17/11/2021 | <LOD |
| S22FD00132 | Lettuce | Belgium                       | 17/11/2021 | <LOD |
| S22FD00133 | Potato  | Belgium                       | 10/08/2021 | <LOD |
| S22FD00134 | Potato  | Germany                       | 10/08/2021 | <LOD |
| S22FD00135 | Potato  | Spain                         | 10/08/2021 | <LOD |
| S22FD00136 | Potato  | Belgium                       | 10/08/2021 | <LOD |
| S22FD00137 | Potato  | Belgium                       | 10/08/2021 | <LOD |



|            |         |         |            |      |
|------------|---------|---------|------------|------|
| S22FD00138 | Potato  | Belgium | 10/08/2021 | <LOD |
| S22FD00139 | Potato  | Belgium | 10/08/2021 | <LOD |
| S22FD00140 | Potato  | Belgium | 17/11/2021 | <LOD |
| S22FD00141 | Potato  | Belgium | 17/11/2021 | <LOD |
| S22FD00142 | Potato  | Spain   | 17/11/2021 | <LOD |
| S22FD00143 | Potato  | Belgium | 17/11/2021 | <LOD |
| S22FD00144 | Onion   | Belgium | 10/08/2021 | <LOD |
| S22FD00145 | Onion   | Belgium | 10/08/2021 | <LOD |
| S22FD00146 | Onion   | Belgium | 10/08/2021 | <LOD |
| S22FD00147 | Onion   | Belgium | 10/08/2021 | <LOD |
| S22FD00148 | Onion   | Belgium | 10/08/2021 | <LOD |
| S22FD00149 | Onion   | Belgium | 15/08/2021 | <LOD |
| S22FD00150 | Onion   | Belgium | 16/08/2021 | <LOD |
| S22FD00151 | Onion   | Belgium | 17/08/2021 | <LOD |
| S22FD00152 | Onion   | Belgium | 17/08/2021 | <LOD |
| S22FD00153 | Onion   | Belgium | 17/08/2021 | <LOD |
| S22FD00154 | Onion   | Belgium | 17/08/2021 | <LOD |
| S22FD00155 | Carrots | Belgium | 10/08/2021 | <LOD |
| S22FD00156 | Carrots | Belgium | 10/08/2021 | <LOD |
| S22FD00157 | Carrots | Belgium | 10/08/2021 | <LOD |

|            |         |         |            |      |
|------------|---------|---------|------------|------|
| S22FD00158 | Carrots | Belgium | 10/08/2021 | <LOD |
| S22FD00159 | Carrots | Belgium | 10/08/2021 | <LOD |
| S22FD00160 | Carrots | Belgium | 10/08/2021 | <LOD |
| S22FD00161 | Carrots | Belgium | 10/08/2021 | <LOD |
| S22FD00162 | Carrots | Belgium | 10/08/2021 | <LOD |
| S22FD00163 | Carrots | Belgium | 10/08/2021 | <LOD |
| S22FD00164 | Carrots | Belgium | 17/11/2021 | <LOD |
| S22FD00165 | Carrots | Belgium | 17/11/2021 | <LOD |
| S22FD00166 | Carrots | Belgium | 17/11/2021 | <LOD |
| S22FD00167 | Carrots | Belgium | 17/11/2021 | <LOD |
| S22FD00168 | Tomato  | Belgium | 27/07/2021 | <LOD |
| S22FD00169 | Tomato  | Belgium | 27/07/2021 | <LOD |
| S22FD00170 | Tomato  | Belgium | 27/07/2021 | <LOD |
| S22FD00171 | Tomato  | Belgium | 27/07/2021 | <LOD |
| S22FD00172 | Tomato  | Belgium | 27/07/2021 | <LOD |
| S22FD00173 | Tomato  | Belgium | 27/07/2021 | <LOD |
| S22FD00174 | Tomato  | Belgium | 27/07/2021 | <LOD |
| S22FD00175 | Tomato  | Belgium | 27/07/2021 | <LOD |
| S22FD00176 | Tomato  | Belgium | 27/07/2021 | <LOD |
| S22FD00177 | Tomato  | Belgium | 27/07/2021 | <LOD |

|            |               |                      |            |      |
|------------|---------------|----------------------|------------|------|
| S22FD00178 | Tomato        | Belgium              | 27/07/2021 | <LOD |
| S22FD00179 | Tomato        | Belgium              | 27/07/2021 | <LOD |
| S22FD00180 | Tomato        | Belgium              | 27/07/2021 | <LOD |
| S22FD00181 | Cherry tomato | Belgium              | 27/07/2021 | <LOD |
| S22FD00182 | Cherry tomato | Belgium              | 27/07/2021 | <LOD |
| S22FD00183 | Cherry tomato | Hoogstraten, Belgium | 27/07/2021 | <LOD |
| S22FD00184 | Cherry tomato | Belgium              | 27/07/2021 | <LOD |
| S22FD00185 | Cherry tomato | Belgium              | 27/07/2021 | <LOD |
| S22FD00186 | Cherry tomato | Belgium              | 27/07/2021 | <LOD |
| S22FD00187 | Cherry tomato | Belgium              | 27/07/2021 | <LOD |
| S22FD00188 | Cherry tomato | Belgium              | 27/07/2021 | <LOD |
| S22FD00189 | Cherry tomato | Belgium              | 27/07/2021 | <LOD |
| S22FD00190 | Cherry tomato | Belgium              | 27/07/2021 | <LOD |
| S22FD00191 | Cherry tomato | Belgium              | 27/07/2021 | <LOD |
| S22FD00192 | Cherry tomato | Belgium              | 27/07/2021 | <LOD |
| S22FD00193 | Cherry tomato | Belgium              | 27/07/2021 | <LOD |
| S22FD00194 | Cherry tomato | Belgium              | 27/07/2021 | <LOD |
| S22FD00195 | Chicory       | Belgium              | 29/06/2021 | <LOD |
| S22FD00196 | Chicory       | Belgium              | 30/06/2021 | <LOD |
| S22FD00197 | Chicory       | Belgium              | 30/06/2021 | <LOD |

|            |         |                               |            |      |
|------------|---------|-------------------------------|------------|------|
| S22FD00198 | Chicory | Belgium                       | 30/06/2021 | <LOD |
| S22FD00199 | Chicory | Belgium                       | 30/06/2021 | <LOD |
| S22FD00200 | Chicory | Belgium                       | 30/06/2021 | <LOD |
| S22FD00201 | Chicory | Belgium                       | 30/06/2021 | <LOD |
| S22FD00202 | Chicory | Belgium                       | 30/06/2021 | <LOD |
| S22FD00204 | Chicory | Belgium                       | 30/06/2021 | <LOD |
| S22FD00205 | Chicory | Belgium                       | 30/06/2021 | <LOD |
| S22FD00206 | Chicory | Belgium                       | 30/06/2021 | <LOD |
| S22FD00207 | Chicory | Belgium                       | 30/06/2021 | <LOD |
| S22FD00208 | Chicory | Sint-Katelijne Waver, Belgium | 30/06/2021 | <LOD |
| S22FD00211 | Chicory | Sint-Katelijne Waver, Belgium | 30/06/2021 | <LOD |
| S22FD00212 | Chicory | Belgium                       | 30/06/2021 | <LOD |

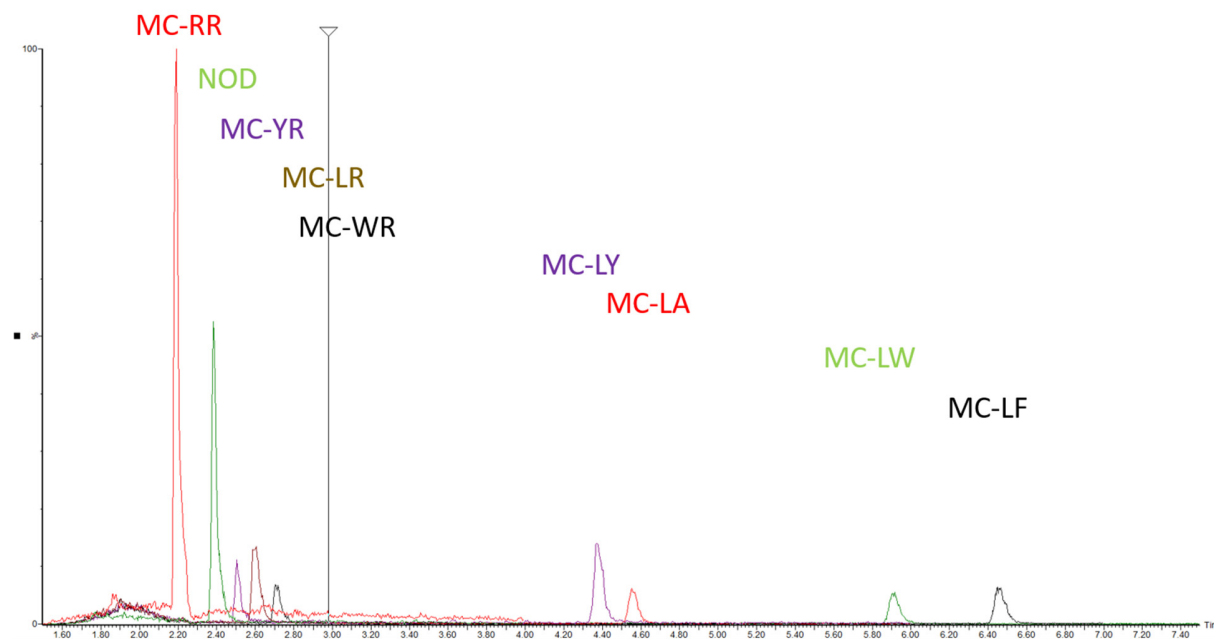

Figure S1: The elution peaks for 8 microcystin congeners and NOD in carrot matrix at validation level  $5 \text{ ng g}^{-1}$ . The peaks are presented together at representable ratios based on the peak intensities by overlaying the chromatograms of the different toxins. However, during analysis, the chromatograms for each toxin are analyzed separately.

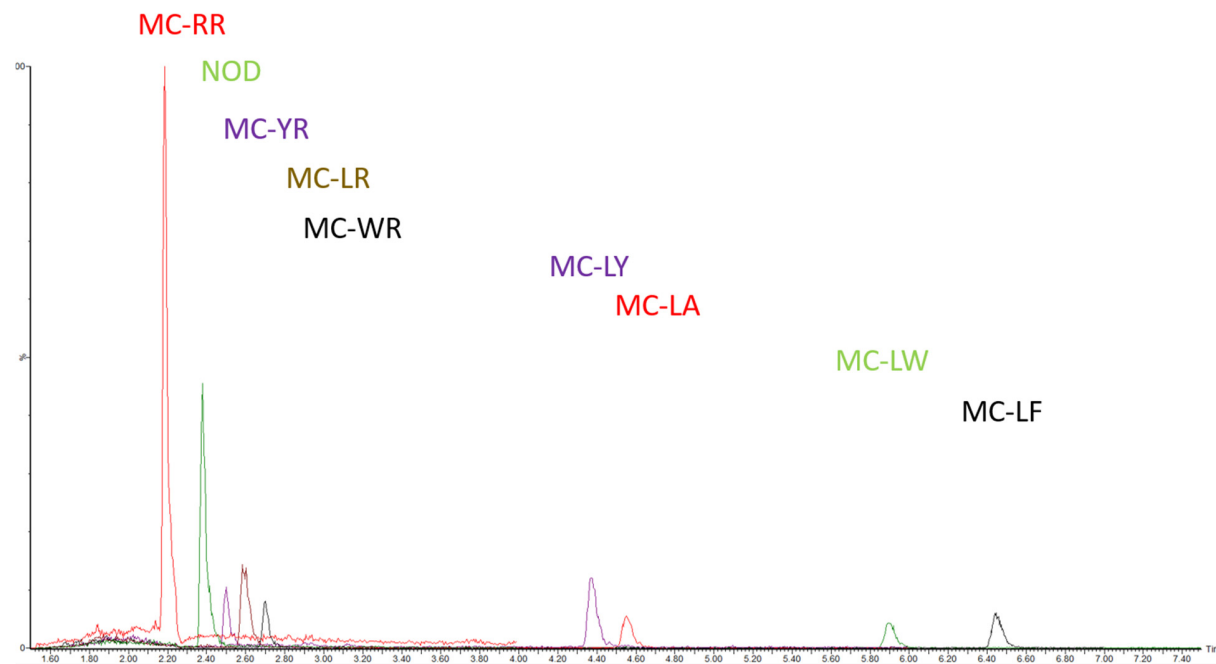

Figure S2: elution peaks for 8 microcystin congeners and NOD in lettuce matrix at validation level  $5 \text{ ng g}^{-1}$ . The peaks are presented together at representable ratios based on the peak intensities by overlaying the chromatograms of the different toxins. However, during analysis, the chromatograms for each toxin are analyzed separately.

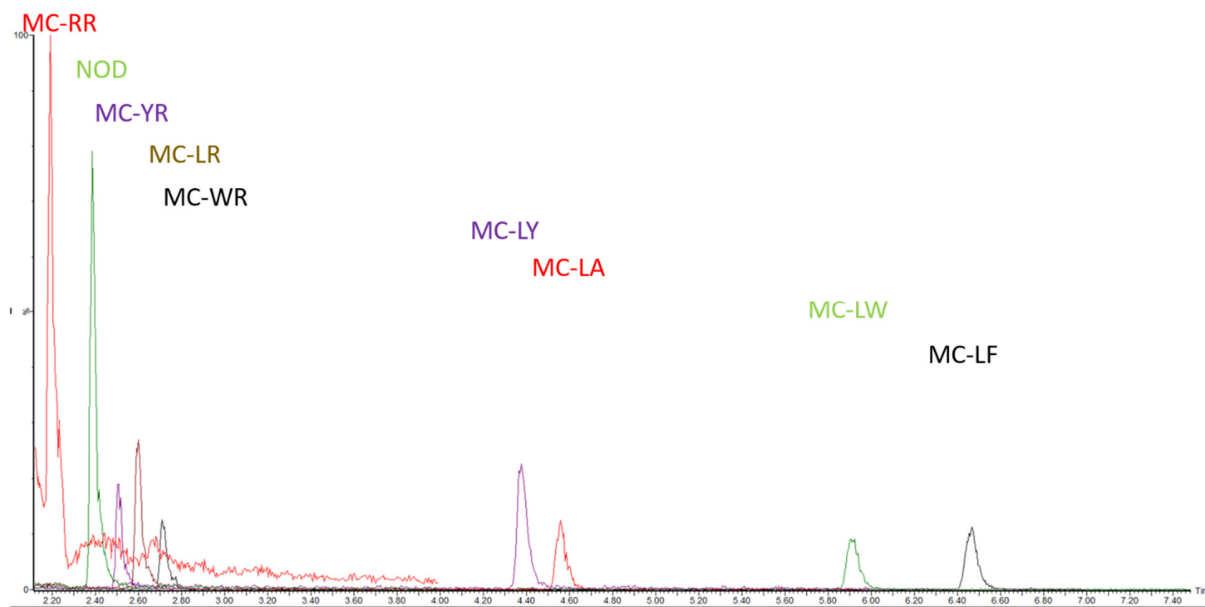

Figure S3: elution peaks for 8 microcystin congeners and NOD in lettuce matrix at validation level  $5 \text{ ng g}^{-1}$ . The peaks are presented together at representable ratios based on the peak intensities by overlaying the chromatograms of the different toxins. However, during analysis, the chromatograms for each toxin are analyzed separately.
